# Supplementary material for: Proprioception and muscle performance unchanged by in-home step training in multiple sclerosis: secondary outcomes analysis
Source: PeerJ journal article supplement (doi:10.7717/peerj.20354), 2025-12-19
Supplement: Data.zip [file Djajadikarta et al Summary Data.xlsx]

## Sheet: control group
Participant demographics
Control group
Integer ID	Sex	Age (years)	Height (cm)	Weight (kg)	EDSS	IPEQ av hrs/week	Leg	Ankle range DF	Ankle range PF	MS type	MS type SPSS	Withdrew	Withdrew SPSS
34	M	46	178.5	83.7	6	8.31	Left	22	44	SPMS	2	N	2
35	F	61	169	69	3	18.94	Right	16	46	Unknown	4	N	2
36	F	39	165	67.5	3	14.25	Left	20	44	RRMS	1	N	2
37	M	55	177.8	95.4	2.5	11.12	Left	22	32	RRMS	1	N	2
38	M	52	175	75	3.5	41.44	Left	22	55	RRMS	1	N	2
39	F	44	161	71	6	15.25	Right	12	31	Unknown	4	N	2
40	M	46	177	70	3.5	15.06	Left	16	36	SPMS	2	N	2
41	F	54	156	57.5	4.5	10.06	Left	5	47	RRMS	1	N	2
42	F	52	167	76.7	3.5	21.38	Left	18	40	RRMS	1	N	2
43	F	49	160.8	112.7	6	2	Right	11	42	RRMS	1	Y	1
44	F	33	177	54.8	4.5	37.38	Left	17	50	RRMS	1	N	2
45	F	64	151	58.8	4.5	37.88	Left	3	45	PPMS	3	N	2
46	F	55	171.5	78.1	4.5	22.5	Left	9	37	SPMS	2	N	2
47	F	37	159	75	4	9.38	Left	28	51	RRMS	1	N	2
48	F	57	148.5	47.8	4.5	19.88	Right	17	47	RRMS	1	Y	1
49	M	53	179	90.5	6	6.88	Left	20	20	RRMS	1	N	2
50	M	50	174	98.9	4	5.75	Right	2	35	PPMS	3	N	2
51	F	60	158.6	70.9	6	9.56	Left	-25	38	SPMS	2	N	2
52	F	34	164.2	52.7	4	27.12	Left	14	50	RRMS	1	Y	1
53	F	35	153.5	79	3	31.75	Right	26	29	RRMS	1	N	2
54	F	41	159	44.7	5.5	13.12	Right	11	28	SPMS	2	N	2
55	M	57	179	104.8	6	17.5	Right	3	50	SPMS	2	N	2
56	F	63	169.8	86.6	4	17.38	Left	22	47	RRMS	1	N	2
57	M	48	186.3	76.9	5	18.25	Right	23	23	PPMS	3	N	2
58	F	46	156	82	3.5	48.38	Right	4	68	RRMS	1	N	2
59	F	62	170	108.6	2	29	Left	7	54	Unknown	4	N	2
60	M	43	176	72	5	11.88	Right	7	26	RRMS	1	Y	1
61	F	59	158.4	62.3	3.5	14.88	Right	6	53	RRMS	1	N	2
62	F	62	162	71.1	2.5	40.5	Left	19	43	RRMS	1	N	2
63	F	40	155	61	3.5	71.38	Right	8	36	PPMS	3	N	2
64	M	64	176	72	6	16	Right	19	20	SPMS	2	N	2
65	F	30	162.5	60.2	4	41.81	Right	22	49	RRMS	1	N	2
66	M	44	171	66	6	6.5	Left	-16	16	PPMS	3	N	2

## Sheet: intervention group
Participant demographics
Step-training intervention group
Integer ID	Sex	Age (years)	Height (cm)	Weight (kg)	EDSS	IPEQ av hrs/week	Leg	Ankle range DF	Ankle range PF	MS type	MS type SPSS	Withdrew	Withdrew SPSS
1	F	46	159	100	3.5	15.56	Left	11	64	RRMS	1	N	2
2	M	44	177	115.8	6	14.75	Right	5	27	PPMS	3	N	2
3	F	32	150.5	51.4	4.5	9.62	Left	5	40	RRMS	1	Y	1
4	F	61	162	57.6	3.5	45.88	Left	24	50	Unknown	4	N	2
5	F	53	161.5	72.5	5	27.25	Left	6	25	RRMS	1	N	2
6	M	70	162.7	76	6	4.38	Right	18	30	PPMS	3	Y	1
7	F	62	158	52	3.5	96	Right	21	56	RRMS	1	N	2
8	F	56	160	77	5	38.38	Right	-28	46	SPMS	2	Y	1
9	F	78	154	106.6	4.5	8.75	Right	14	21	SPMS	2	N	2
10	M	49	172	68.5	3	29.5	Left	16	38	RRMS	1	N	2
11	F	34	163.3	60.6	3.5	27.75	Left	27	58	RRMS	1	Y	1
12	F	48	165.5	73.3	3.5	36.5	Right	10	51	Unknown	4	N	2
13	F	54	178.8	67.8	3.5	14.19	Right	21	52	RRMS	1	N	2
14	F	70	163	83	5.5	14.69	Left	12	57	RRMS	1	N	2
15	F	70	158.6	70.9	6	37.38	Right	12	15	SPMS	2	N	2
16	M	36	172.5	94	3.5	25.94	Right	7	47	RRMS	1	N	2
17	F	47	160.5	91	3	44.88	Left	27	32	RRMS	1	Y	1
18												Y	1
19	F	46	159	55	2.5	18.75	Left	18	37	PPMS	3	N	2
20	M	66	169.5	104	4.5	15.44	Left	17	32	RRMS	1	N	2
21	F	38	177.4	80.1	2.5	34.25	Left	25	63	RRMS	1	Y	1
22	F	56	157.5	57.5	2.5	34.88	Right	29	53	RRMS	1	N	2
23	F	60	156	82	3	13.62	Right	5	40	SPMS	2	N	2
24	F	66	156	80.9	4	23.62	Left	6	44	Unknown	4	N	2
25	F	39	166.3	53.6	2	41	Right	28	43.5	RRMS	1	N	2
26	F	59	168.5	94.2	3.5	22.62	Left	7	63	RRMS	1	N	2
27	F	62	157.5	63.1	3	30.5	Right	15	44	RRMS	1	N	2
28	F	31	160.1	44.7	3	23.12	Right	37	54	RRMS	1	N	2
29	F	30	154	56	3	27.75	Left	25	48	RRMS	1	N	2
30	F	68	158	49.2	3	38	Left	12.5	44	RRMS	1	N	2
31	M	56	180	87.4	2.5	49	Left	18	33	RRMS	1	N	2
32	M	68	167	65	3	21	Left	13	30	RRMS	1	N	2
33	M	55	170	91	6	8.94	Right	19	35	RRMS	1	N	2

## Sheet: long-form
	0=control				intervention				Balance and gait				Proprioception			Brief max contractions (MVC)				Performance at end of fatiguing contraction							Time to recovery NB. Blank= >120 s				time to recovery uses brief max contractions (MVC) in recovery period at 15, 30, 60, 90 and 120 s after end of fatiguing contraction
	1=intervention							postural sway	10 mwt (s)	10 mwt (m/s)	6 mwt (m)		detection threshold (°)	reaction time (s)		Max torque (Nm)	Max VA (%)	Max twitch (Nm)		Fatigued torque (Nm)	Fall in torque (% max torque)	Fatigued VA (%)	Fall in VA (%)	Fatigued twitch (Nm)	Fall in twitch (% max twitch)		Torque recovery (s)	VA recovery (s)	Twitch recovery (s)				Torque (Nm)					VA(%)					Resting Twitch (Nm)
integer id	group	session	ipeq_initial	ipeq_6month	step_time	step_time_h		total_sway_foam	time_10mwt	speed_10mwt_m/s	dist_6mwt		detect_thresh	reaction_time		max_torque	max_va	max_twitch		fat_torque	fall_torque	fat_va	fall_va	fat_twitch	fall_twitch		rt_torque	rt_va	rt_twitch		15	30	60	90	120	15	30	60	90	120	15	30	60	90	120
34	0	0	8.31	15.44	0	0		608	9.44	1.05932	183		0.4003	0.358317		72.26	83.55	23.02		19.9697	-72.3637	25.232	-58.32	21.8887	-4.90878		15	15	15		75.3312	77.1464	72.3762	72.137	74.8563	81.1707	81.6802	81.5552	76.946	80.6818	24.7052	25.8622	27.4977	26.63	26.6644
35	0	0	18.94	23	0	0		263	6	1.66667	651.5		0.1778	0.227423		88.06	99.47	17.51		50.0467	-43.1638	77.5293	-21.94	20.5175	17.1902		15	15	15		87.5016	89.5381	93.1906	95.3925	94.7536	99.1417	99.1946	99.5239	99.3331	99.3421	20.9764	21.9155	21.5024	21.7037	20.3904
36	0	0	14.25	15.25	0	0		83	5	2	586		0.1169	0.26139		108.84	91.14	27.7		90.799	-16.5748	86.9712	-4.17	22.6172	-18.3393			15	15		101.475	101.072	99.8343	101.076	99.4477	92.6592	88.8019	89.0084	76.4689	75.9828	28.2463	26.2215	29.1195	24.809	22.6555
37	0	0	11.12	33.75	0	0		150	5.5	1.81818	555		0.113	0.284		139.22	92.01	25.4		75.6526	-45.6615	62.5641	-29.45	25.6149	0.826772				15		104.767	110.075	115.916	116.803	120.309	81.5347	83.1166	85.064	81.4041	80.0266	26.5602	27.9609	27.8457	27.7485	27.0427
38	0	0	41.44	33	0	0		125	4.93	2.0284	665		0.1212	0.199668		136.99	99.82	22.69		80.289	-41.3899	89.0322	-10.79	21.2585	-6.30234				15		108.476	112.416	111.614	115.651	117.372	94.5692	92.5142	92.1526	88.0026	89.6167	24.5918	25.017	23.8643	23.1033	22.3833
39	0	0	15.25	6.75	0	0		188	14.88	0.672043	143.5		0.0856	0.425469		19.53	8.52	18.22		35.6358	82.4885	51.6953	43.18	20.6147	13.1174		16	15	15		16.1491	36.1138	35.266	22.4005	15.7134	11.7493	42.3188	44.4599	19.1625	13.693	19.6643	20.1946	19.8571	19.9811	20.167
40	0	0	15.06	11.56	0	0		248	4.97	2.01207	566		0.1473	0.229147		111.95	98.81	23.9		41.0385	-63.3408	38.4839	-60.33	22.1617	-7.28034			15	15		90.5055	94.7306	96.8108	96.1436	97.9983	94.5061	95.8642	96.7053	95.8601	95.1977	24.1298	25.1673	25.7267	24.8147	24.357
41	0	0	10.06	8.81	0	0		419	9.28	1.07759	292		1.2642	0.88		11.94	27.68	13.46		7.80306	-34.6734	-20.891	-27.68	12.3673	-8.09807		15	113.5	15		14.904	16.2328	6.07664	13.181	14.3242	18.8371	20.5959	9.72858	10.9691	29.3369	13.4385	13.777	13.3989	12.1134	13.5754
42	0	0	21.38	22.12	0	0		216	5.76	1.73611	533		0.2234	0.216431		104.29	99.86	20.1		53.7105	-48.4994	98.8659	-0.99	19.4082	-3.43284			15	15		89.9899	87.135	92.7757	96.8015	93.1154	99.7467	99.1348	99.6415	98.8865	99.5625	20.615	20.2643	20.8127	20.7717	20.4658
43	0	0	2	11.5	0	0		348	23.03	0.434216	155		0.2217	0.745315		34.77	43.5	23.28		17.3855	-49.9856	19.4453	-24.05	27.1008	16.4089				15		17.3387	13.1791	15.3013	15.0504	26.1129	21.0206	12.3782	16.5262	17.7844	27.1488	27.3915	27.5854	26.6297	27.2317	27.1841
44	0	0	37.38	11.5	0	0		1032	8.63	1.15875	277		0.1625	0.529832		63.99	96.31	20.58		24.2427	-62.1191	48.9436	-47.37	21.6665	5.2964			101.5	15		47.1342	47.1579	48.3662	56.6308	55.8247	81.5674	89.4572	88.2129	91.3184	96.0986	21.8509	22.0847	22.5195	22.3811	22.7072
45	0	0	37.88	9.56	0	0		377	12.16	0.822368	258		0.1144	0.286658		57.85	77.92	18.8		39.648	-31.4607	63.7117	-14.21	19.1743	1.96809				15		41.1314	44.3895	39.7037	39.3569	41.1564	61.9472	66.4122	61.4758	60.0214	61.4323	19.7973	19.8856	20.3798	19.7973	20.2104
46	0	0	22.5	21.38	0	0		109	7.76	1.28866	347		0.0828	0.317		61.23	55.75	28.39		29.9596	-51.0697	20.5349	-35.22	32.7283	15.2871				15		48.326	53.2826	47.1395	54.8215	49.259	45.5235	47.5051	40.3391	48.7106	40.4664	33.9584	34.8501	34.9594	34.8518	34.7743
47	0	0	9.38	17.44	0	0		78	7.16	1.39665	417		0.0406	0.208627		91.58	98.86	19.99		41.7972	-54.3569	84.7261	-14.13	15.3069	-23.4117			15	117.4		74.8473	82.3819	81.5399	81.5764	86.5595	96.4127	99.5281	97.6176	98.6018	96.6159	16.3175	18.9722	17.3436	17.9771	19.2305
48	0	0	19.88	25.54	0	0			7.91	1.26422	376.5		0.3797	0.435791		68.23	89.9	16.31		47.0131	-31.1007	54.5164	-35.38	12.2131	-25.138		15		15		72.3739	73.4582	74.5135	65.5136	61.3586	81.1951	76.8657	78.3468	70.6938	70.4468	15.4751	16.3998	16.8621	17.0525	16.9097
49	0	0	6.88	32.88	0	0			8.46	1.18203	360		0.1191	0.375195		65.68	89.39	19.3		31.9283	-51.3855	50.874	-38.52	20.0693	3.98964		15	15	15		72.5659	63.6797	56.0926	66.2616	66.1727	85.19	88.0767	84.5251	85.0447	86.2489	20.5738	21.0716	21.0716	22.0271	22.2309
50	0	0	5.75	12.62	0	0		247	6.75	1.48148	402		0.1824	0.394839		44.57	49.62	20.36		43.4479	-2.5129	43.8135	-5.81	24.1019	18.3694		105.7	119.9	15		28.0275	41.2019	37.0529	40.2633	51.6063	25.3806	34.7639	29.3478	36.2164	44.1857	23.9885	23.9601	24.1409	23.8608	24.2119
51	0	0	9.56	5.38	0	0		210	8.47	1.18064	277		0.1297	0.533		39.77	60.15	15.77		17.5148	-55.9718	28.3416	-31.81	17.1132	8.49715				15		24.0143	27.809	26.6575	31.6311	30.1452	42.3321	46.4045	39.6635	49.6349	45.6148	18.4826	17.462	16.8011	17.5978	17.7079
52	0	0	27.12	42.38	0	0		559	7	1.42857	399		0.3021	0.315		68.49	77.69	20.63		44.1639	-35.5234	55.9292	-21.76	20.5228	-0.533204			15	15		58.2231	50.8904	46.5329	48.5138	50.9984	76.7495	67.7647	57.4776	58.947	63.0362	21.9859	22.3705	22.8594	22.6006	21.4538
53	0	0	31.75	27.75	0	0		160	5.76	1.73611	452		0.1571	0.352484		74.15	87.14	22.02		48.8933	-34.0661	72.4009	-14.74	23.5764	7.08447		15	15	15		81.0994	80.5499	80.002	67.2619	69.8043	88.1218	86.763	88.9366	76.223	78.1457	25.5583	26.0513	27.5743	27.3805	26.5748
54	0	0	13.12	5.5	0	0		98	11.72	0.853242	189		0.4257	0.621647		26.35	49.33	13.41		18.2	-30.9298	18.4638	-30.87	13.8907	3.57942			42	15		19.9719	19.7156	22.6986	17.7085	21.4275	.	38.1268	46.5039	41.1545	41.4406	.	14.6573	14.5118	14.9931	15.1236
55	0	0	17.5	14.88	0	0		394	7.75	1.29032	380		0.1206	0.218		111.41	99.95	21.4		64.5154	-42.0878	90.3754	-9.57	20.2634	-5.3271			86.4	15		70.9303	77.7866	83.3942	86.5691	92.4331	88.3214	71.3392	88.2454	92.7926	97.4396	21.3148	22.1091	22.7155	22.3857	22.297
56	0	0	17.38	5.88	0	0		290	6.62	1.51057	360		0.0747			45.97	47.72	16.43		21.973	-52.208	11.9043	-35.82	17.0414	3.71272			23.7	15		28.2305	28.8278	29.6681	3.7123	10.4419	40.6724	36.5772	40.0074	7.07698	15.0018	19.6732	18.5218	18.4327	19.3202	18.8679
57	0	0	18.25	25.12	0	0		532	5.97	1.67504	432		0.031991	0.248		148.41	98.81	33.65		78.8514	-46.8702	65.4147	-33.4	28.0654	-16.5825			15			128.405	126.864	129.835	134.758	128.897	99.7923	98.6456	99.9768	99.5304	99.9218	28.4794	27.4844	29.9823	29.6344	31.1617
58	0	0	48.38	33.5	0	0		181	5.84	1.71233	437		0.0458	0.309		29.94	50.62	25.01		56.8933	90.0134	53.4725	2.85	24.363	-2.59896		22		15		26.9744	27.1821	32.4174	22.4539	30.8136	32.7989	32.1952	38.6856	38.4565	37.5133	25.4564	25.9971	26.3917	25.7795	25.6298
59	0	0	29	30.38	0	0		132	5.5	1.81818	467		0.0781	0.41425		110.19	76.57	30.73		84.6028	-23.2235	65.8828	-10.69	33.1432	7.8425		15	15	15		107.173	114.049	121.93	130.278	83.6577	76.9857	81.8607	83.2564	83.0204	51.9052	35.7931	37.6602	38.897	38.6157	38.3277
60	0	0	11.88	25.77	0	0		349	7.35	1.36054	400		0.0624	0.351		86.97	66.92	26.07		14.006	-83.891	4.99558	-61.92	27.9926	7.36479		29.1	23.8	15		69.9308	81.7268	89.1773	79.3443	84.216	57.8491	61.5859	68.942	59.3733	64.6593	27.633	28.9838	28.4853	28.0515	29.76
61	0	0	14.88	12.25	0	0		612	9.53	1.04932	279		0.1615	0.332626		59.52	81.62	18.42		30.312	-49.0759	55.7134	-25.91	18.8453	2.33442		26.7	15	15		49.9529	59.6319	63.4221	67.9411	67.7756	80.4644	93.3533	90.7968	93.2117	89.9206	19.9144	20.8056	20.6226	21.6697	21.7883
62	0	0	40.5	38.94	0	0		57	3.09	3.23625	603		0.2024	0.296929		120.11	99.01	19.38		63.121	-47.4482	73.0966	-25.91	19.4903	0.567596				15		92.6181	95.5	98.0338	100.942	105.868	92.9653	91.4276	85.2293	87.8907	90.4237	19.3191	20.3892	19.7543	19.9719	20.375
63	0	0	71.38	24	0	0		109	8.59	1.16414	328		0.436	0.398375		65.45	98.47	20.06		36.9802	-43.4989	70.8311	-27.64	19.5955	-2.29312				15		42.0393	45.4604	47.9774	50.1491	53.2196	75.6474	86.7186	86.402	83.7536	83.6087	19.413	19.444	20.384	20.3461	20.6284
64	0	0	16	27.31	0	0		210	10.25	0.97561	288		0.0909	0.312329		66.26	73.6	29.1		50.0599	-24.4491	65.6934	-7.91	29.7186	2.13058		15	15	15		65.2376	65.5919	63.0359	52.0989	64.0548	70.3146	66.826	69.2927	58.0364	65.0592	31.0855	30.9719	32.0806	31.5986	32.2735
65	0	0	41.81	79.75	0	0		118	6.59	1.51745	430		0.0806	0.459213						.		.		.							.	.	.	.	.	.	.	.	.	.	.	.	.	.	.
66	0	0	6.5	5.88	0	0		183	9.71	1.02987	272		0.1338	0.59202		60.4	66.68	23.36		24.9641	-58.6755	26.4585	-40.22	25.4498	8.94692		28.6	15	15		52.7193	61.4285	54.5728	57.0498	49.4293	66.0889	71.9541	60.1804	63.476	52.4716	26.2593	26.6697	25.2297	26.2295	24.3008
34	0	1	8.31	15.44	0	0			9.73	1.02775	254		0.4791	0.35881		81.06	78.84	27.65		30.4835	-62.3982	28.907	-49.93	22.6559	-18.047		34.5	52.5	70.5		66.7009	75.4182	82.6861	81.3182	72.287	67.5742	72.1983	73.2459	72.8606	68.6404	24.5395	25.4303	25.6077	26.7741	25.8191
35	0	1	18.94	23	0	0		210	5.81	1.72117	553		0.0955	0.246764		98.23	99.76	18.12		58.5983	-40.3441	71.2293	-28.53	18.929	4.4702		15	15	15		94.4197	91.8593	93.6201	93.0733	92.7169	99.1215	98.5563	99.0455	99.0241	98.7905	20.4752	19.882	18.8448	19.216	17.7196
36	0	1	14.25	15.25	0	0		42	4.41	2.26757	603		0.0787	0.281951		122.58	86.21	28.11		110.803	-9.61005	96.2971	10.09	23.851	-15.1547			15	15		106.123	93.4619	97.6216	86.8576	94.8871	88.3079	77.072	76.4578	64.5922	64.9689	28.5032	31.0113	33.3676	29.9902	28.3135
37	0	1	11.12	33.75	0	0		84	5.22	1.91571	475		0.1478	0.248574		137.52	94.74	25.13		98.0995	-28.6649	95.1209	0.38	23.3589	-7.04338		37.5	15	15		113.538	127.096	133.809	130.382	133.675	92.0842	97.745	88.57	97.0441	95.6202	25.3594	26.1101	26.7505	26.0929	26.2581
38	0	1	41.44	33	0	0		70	5.34	1.87266	558		0.2195	0.559267		114.75	100	18.89		75.9211	-33.8388	91.8943	-8.11	21.7203	14.9815				15		99.0581	98.5963	100.811	106.728	106.214	89.4865	87.997	86.8865	87.2527	91.5399	22.0001	23.6644	22.5846	22.3386	21.3158
39	0	1	15.25	6.75	0	0		90	38.57	0.259269	77.5		0.21	0.397608		18.36	7.19	18.54		44.5227	142.484	46.2833	39.09	21.2007	14.3474		21.2	19.4	15		11.3918	24.6998	23.6712	20.6814	17.5695	-15.234		5.7602	-2.23839	-24.0871	21.2101	.	20.9044	20.2363	20.4665
40	0	1	15.06	11.56	0	0		424	4.75	2.10526	430.5		0.0715	0.275691		152.17	98.43	31.06		73.6453	-51.6002	61.4995	-36.93	22.1617	-28.6542			15			90.5055	94.7306	96.8108	96.1436	97.9983	94.5061	95.8642	96.7053	95.8601	95.1977	24.1298	25.1673	25.7267	24.8147	24.357
41	0	1	10.06	8.81	0	0		573	12.31	0.812348	250		0.4035	0.609438		29.22	45.62	13.91		57.4611	96.6461	74.8115	29.19	18.2629	31.2725		15	15	15		34.8261	17.6202	21.1405	34.0448	34.3247	52.3405	26.3338	29.4853	48.2678	49.0207	19.0514	19.1031	18.9998	19.0824	18.986
42	0	1	21.38	22.12	0	0		36	5.22	1.91571	540		0.1241	0.235764		107.8	99.8	18.17		45.8975	-57.4211	78.9249	-20.88	17.5363	-3.46725			15	15		72.2051	84.2758	76.6432	87.479	89.0375	98.5322	99.5363	98.7938	98.847	98.8075	18.6963	19.2131	18.9102	18.2366	16.4368
43	0	1	2	11.5	0	0														.		.		.							.	.	.	.	.	.	.	.	.	.	.	.	.	.	.
44	0	1	37.38	11.5	0	0		203	5.94	1.6835	263		0.3636	0.289634		60.17	86	21.07		23.9702	-60.1629	39.909	-46.09	18.0052	-14.523			37.1	15		47.2557	50.4195	52.1856	53.6348	51.9082	78.3382	80.3057	82.1697	82.3044	82.6238	22.5352	22.8812	23.271	22.9541	23.1035
45	0	1	37.88	9.56	0	0		329	21.69	0.461042	168		0.1189	0.332156		46.83	64.56	19.15		27.7445	-40.7645	55.687	-8.87	18.4391	-3.70757		119.9	15	15		36.0781	34.6586	32.047	34.5637	44.5222	61.9018	62.3792	56.1332	59.6902	67.4213	18.6343	19.0132	18.8448	19.2734	19.947
46	0	1	22.5	21.38	0	0		90	7.5	1.33333	383		0.0729	0.334401		60.46	49.49	28.62		47.3652	-21.6507	30.8294	-18.66	32.7416	14.3955			15	15		55.8017	55.148	54.954	54.3416	54.3767	46.3382	44.1906	41.8669	45.1478	41.2488	33.2096	33.4863	33.558	33.6161	33.3155
47	0	1	9.38	17.44	0	0		75	6.75	1.48148	310.5		0.1826	0.217429		92.19	92.35	19.89		41.02	-55.5049	72.9634	-19.39	19.253	-3.2177			15	15		68.298	70.6185	77.2648	81.1511	80.616	88.1353	84.9267	89.3629	90.6867	80.1189	20.425	20.3344	20.7949	20.8327	19.6889
48	0	1	19.88	25.54	0	0														.		.		.							.	.	.	.	.	.	.	.	.	.	.	.	.	.	.
49	0	1	6.88	32.88	0	0			7.25	1.37931	354		0.077357	0.476855		67.18	66.75	23.02		58.5028	-12.9205	58.263	-8.49	25.92	12.5977		15	15	15		74.5887	97.6845	83.6452	67.9422	62.5326	66.393	79.0022	77.0228	65.468	62.2957	29.5375	25.2642	30.5657	29.4487	29.0456
50	0	1	5.75	12.62	0	0														.		.		.							.	.	.	.	.	.	.	.	.	.	.	.	.	.	.
51	0	1	9.56	5.38	0	0		460	8.16	1.22549	290		0.3185	0.437583		46.53	62.23	15.41		20.8793	-55.1257	29.1459	-33.08	16.4173	6.55419				15		30.7829	31.5319	34.8528	31.414	33.0898	50.568	51.5464	58.6346	48.9013	50.2123	16.4116	16.6095	16.9443	16.9709	17.028
52	0	1	27.12	42.38	0	0														.		.		.							.	.	.	.	.	.	.	.	.	.	.	.	.	.	.
53	0	1	31.75	27.75	0	0		85	5.78	1.7301	481		0.3661	0.337504		73.6	88.91	22.5		60.4607	-17.8533	74.2689	-14.64	21.1138	-6.17778		15	15	15		74.3145	63.4015	60.2795	61.3649	66.2785	90.2177	72.0463	69.2199	72.4028	73.9662	24.3235	25.1909	25.8464	24.6943	24.7936
54	0	1	13.12	5.5	0	0		187	18.4	0.543478	100		0.4103	0.639315		38.48	72.18	14.07		12.592	-67.2817	12.5061	-59.67	14.5622	3.48259				15		23.7535	24.4924	27.2592	26.5218	27.2562	49.4294	51.0618	52.4001	50.8908	54.07	14.9898	15.1039	14.1808	15.2037	15.0611
55	0	1	17.5	14.88	0	0		310	5.87	1.70358	364.5		0.112	0.199707		92.76	89.62	20.64		48.5726	-47.6391	78.6952	-10.92	19.9759	-3.19767				15		.	64.0535	62.8249	67.966	67.1614	.	75.4813	76.7397	79.4798	78.5151	.	20.9246	21.5237	21.4445	21.3791
56	0	1	17.38	5.88	0	0		178	5.94	1.6835	331		0.1559	0.434487		46.39	65.92	15.45		33.3515	-28.1095	57.3098	-8.61	16.6861	8.02589				34.3		.	20.5504	25.5952	31.4204	37.7498	.	37.004	54.0798	32.2384	51.9029	.	13.6703	16.7454	15.5859	18.7085
57	0	1	18.25	25.12	0	0		128	5.78	1.7301	460		0.0526	0.233264		142.64	99.61	27.16		91.3439	-35.9647	95.8542	-3.76	24.1165	-11.1929			15	32.9		117.217	127.048	125.168	124.281	122.986	98.821	104.187		99.6387	99.2064	25.9655	24.7903	27.9387	27.4918	27.1177
58	0	1	48.38	33.5	0	0		204	4.13	2.42131	436		0.037	0.293612		74.88	64.72	28.18		88.6058	18.336	80.7153	16	25.9741	-7.84244		15	15	15		81.8067	78.347	84.2413	87.2406	92.9068	69.3929	63.7215	68.8324	66.2585	70.2474	29.0414	30.3456	29.8283	30.6407	30.1817
59	0	1	29	30.38	0	0		235	6.25	1.6	481		0.1988	0.339564		84.91	76.13	25.37		82.1179	-3.28583	73.4505	-2.68	28.4803	12.2586		15	15	15		103.736	108.495	102.756	90.463	94.6932	79.8762	87.4123	74.4862	66.1089	70.7011	29.8009	31.4475	30.9272	33.4564	32.2709
60	0	1	11.88	25.77	0	0														.		.		.							.	.	.	.	.	.	.	.	.	.	.	.	.	.	.
61	0	1	14.88	12.25	0	0		1050	11.19	0.893655	105		0.4732	0.444786		74.89	86.34	23.14		37.048	-50.5274	59.3212	-27.02	21.5222	-7.00087		60	19.4	43.7		60.5559	64.9882	70.9371	73.8593	71.0133	80.839	82.3925	85.8948	85.2423	83.3528	21.8928	21.6091	22.7261	23.9317	24.2402
62	0	1	40.5	38.94	0	0		128	4.23	2.36407	676		0.1711	0.242682		146.62	99.67	24.55		62.0708	-57.6661	84.2779	-15.39	20.203	-17.7189			15	21		112.733	117.506	112.648	118.551	118.462	99.7977	96.4868		92.1496	93.0583	22.1585	24.5416		23.1517	22.4068
63	0	1	71.38	24	0	0		50	10.73	0.931966	250.5		0.4655	0.585001		60.67	96.48	16.33		31.4299	-48.1951	54.9568	-41.52	15.4763	-5.20514				15		35.4105	31.3335	33.8262	34.1818	45.9131	53.6517	47.1245	54.7218	42.7961	70.2416	16.6399	16.9179	16.7183	15.8559	17.1139
64	0	1	16	27.31	0	0		97	11.67	0.856898	225		0.123	0.274313		58.36	59.58	28.92		53.9033	-7.64222	61.1889	1.61	30.0367	3.87275		15	15	15		60.4151	56.4001	56.7897	61.0132	63.3994	58.2142	55.0442	52.7021	58.6463	49.92	31.4124	31.8294	31.6547	32.1715	26.7151
65	0	1	41.81	79.75	0	0		21	6.4	1.5625	406		0.1398	0.485045						.		.		.							.	.	.	.	.	.	.	.	.	.	.	.	.	.	.
66	0	1	6.5	5.88	0	0		219	11.33	0.882613	283		0.0918	0.662753		59.66	77.71	21.42		30.7587	-48.4412	32.5856	-45.12	23.5147	9.75724			112.7	15		52.5741	49.9431	51.1652	53.3801	56.5749	72.2286	70.9417	66.3971	67.319	75.8761	24.8191	24.6766	24.6801	24.7657	24.6124
1	1	0	15.56	24.38	263483	73.1897		516	7.34	1.3624	390		0.141	0.333634		96.56	78.6	29.22		88.3906	-8.46106	86.0835	7.48	30.6426	4.85968				15		73.7604	70.4086	69.7244	68.1056	76.5041	67.0744	54.1855	51.5604	48.5703	51.0091	33.2752	33.3339	35.3653	35.5193	34.3386
2	1	0	14.75	17	9809	2.72472		384	8.15	1.22699	313		0.2855	0.598		95.55	75.2	27.68		52.2161	-45.348	39.2557	-35.94	30.9212	11.7052		57.6	24.4	15		76.2657	83.3863	90.8707	93.2892	89.4349	62.8873	71.8244	81.0554	73.604	77.3415	32.2624	33.3741	34.207	34.3362	33.5815
3	1	0	9.62	19.06	145051	40.2919		502	8.69	1.15075	340		0.1841	0.38516		67.6	90.18	17.23		47.1027	-30.3254	67.6645	-22.52	15.7429	-8.64771		115.9	15	15		59.3212	61.0637	61.6268	58.1923	66.3146	86.3809	89.7602	87.2248	87.3927	90.8138	17.6263	16.9273	17.9616	18.0887	17.1779
4	1	0	45.88	66.12	181604	50.4456		268	6.25	1.6	496		0.1124	0.273761		46.05	72.17	15.26		43.7926	-4.90771	61.0215	-11.15	14.5961	-4.32503		56.1	15	15		33.2344	38.2385	43.915	45.0316	35.6543	70.3991	66.2915	68.7365	66.2096	43.9847	17.4916	18.3659	18.8267	18.7826	17.7729
5	1	0	27.25	17.12	146163	40.6008			9.31	1.07411	212		0.0689	0.478583		62.94	64.72	27.66		36.5287	-41.9606	46.2308	-18.49	28.7368	3.90456		92.1	15	15		53.2821	52.4993	58.1863	58.748	62.3236	60.9817	57.3453	61.3966	62.7428	67.4484	30.5715	31.592	32.1857	31.2881	31.251
6	1	0	4.38	24.33	6421	1.78361			17.43	0.573723	140		0.5743	0.525943						.		.		.							.	.	.	.	.	.	.	.	.	.	.	.	.	.	.
7	1	0	96	35.88	63286	17.5794		784	5.84	1.71233	420		0.054	0.379		113.44	98.81	23.36		71.2598	-37.1827	92.7988	-6.01	18.9515	-18.8784				17.1		84.6466	87.1893	98.9766	85.0362	89.814	92.0598	89.5713	89.6602	82.5343	83.3256	21.4505	24.8606	24.5869	24.4104	23.2582
8	1	0	38.38	31.38	73695	20.4708		380	10.59	0.944287	265.5		0.1828	0.326165		61.85	76.94	20.71		9.01358	-85.4325	-8.31041	-76.94	17.5543	-15.2583						49.4015	52.3427	53.1943	53.0602	54.9551	38.169	52.0294	52.5698	53.2015	66.9254	17.5923	17.844	18.52	19.0132	18.2165
9	1	0	8.75	19.94	27600	7.66667		567	10.35	0.966184	258		0.1491	0.236		69.2	87.9	21.37		35.1867	-49.1474	46.5746	-41.33	22.1852	3.83716				15		51.178	52.7482	52.1703	55.3537	54.0755	74.9808	79.5173	74.0518	82.2354	82.3026	21.4557	24.1496	23.0102	22.7467	22.6841
10	1	0	29.5	56.88	8925	2.47917		380	5.16	1.93798	628		0.0412	0.247742		100.28	99.24	19.34		51.8053	-48.3347	76.8558	-22.38	20.2248	4.55016			15	15		94.3051	89.8381	90.6475	88.9332	93.3859	98.1712	99.2569	98.6003	96.9789	97.2873	19.7325	23.103	23.0295	22.0344	21.6981
11	1	0	27.75	25.76	29662	8.23944		206	5.72	1.74825	620		0.118	0.27378		105.83	96.58	20.07		65.2037	-38.3918	86.6261	-9.95	16.8894	-15.8445			15	41.6		93.0131	98.9015	98.121	91.7583	97.9346	99.2802	97.8622	97.7375	95.7052	97.4372	18.7192	18.5773	19.7475	20.0631	20.7545
12	1	0	36.5	45.5	3186	0.885		295	7.62	1.31234	363		0.0783	0.247		128.9	98.35	32.55		42.5519	-66.9899	55.5279	-42.82	26.6688	-18.0645			35.4			79.4512	91.7329	102.508	107.104	113.115	89.5231	93.0419	94.9515	95.6937	93.7377	27.8847	28.0207	28.7655	30.1123	30.1565
13	1	0	14.19	26.12	163422	45.395		198	7.62	1.31234	535		0.0764	0.295756		113.88	99.66	27.63		63.0046	-44.6786	84.0851	-15.57	30.0178	8.65002			15	15		85.5785	83.5768	66.1539	82.2131	86.4931	97.679	88.8876	68.5954	94.1637	97.0741	28.528	28.6306	27.9784	27.0581	26.7038
14	1	0	14.69	16.56	120	0.0333333		514	7.5	1.33333	220		0.1185	0.265		59.24	75.27	23.49		62.9958	6.34706	84.2069	8.94	25.7209	9.4934		15	15	15		60.1454	67.2995	76.5492	64.9773	75.6875	78.0573	83.8309	82.2361	67.7909	77.668	29.8657	30.7033	29.3229	29.8441	29.4739
15	1	0	37.38	20.25	187681	52.1336			13.41	0.745712	214		0.1928	0.245		40.39	46.75	22.85		38.8551	-3.78807	49.4268	2.68	25.7997	12.9103				15		27.3473	28.2206	24.4523	22.0468	17.0163	36.9443	30.1877	27.649	22.8213	17.6558	27.3024	27.3431	28.0095	27.9313	27.5539
16	1	0	25.94	36.38	7744	2.15111		298	7.54	1.32626	331		0.1701	0.261393		110.18	83.4	33.09		51.0188	-53.694	49.3121	-34.09	32.4095	-2.055				15		76.4758	74.0066	73.8223	72.0108	78.573	69.3909	67.6249	62.456	61.9445	63.627	33.241	33.7782	34.2361	33.8574	33.3787
17	1	0	44.88	24.95	36991	10.2753		91	6.65	1.50376	482		0.049806	0.477058		104.05	100	16.19		33.7949	-67.5252	99.3538	-0.65	12.2545	-24.336			15			77.0725	72.7916	83.5559	85.7178	97.9905	99.827	99.2412	99.5658	98.7758	99.4852	13.9348	15.4291	13.4803	13.5009	14.045
18	1	0
19	1	0	18.75	40.12	139786	38.8294		229	6.19	1.61551	452		0.0444	0.28858		92.74	97.05	22.59		26.5928	-71.3285	32.6991	-64.35	20.9987	-7.03851		31.6	42.2	15		80.0354	87.7581	88.7669	83.4303	85.3358	88.8507	90.061	93.3603	90.1342	86.5151	22.1498	23.6984	23.5539	23.257	23.7593
20	1	0	15.44	10.25	11550	3.20833		735	8.78	1.13895	408		0.2391	0.340334		87.1	85.44	28.89		80.0776	-8.0597	93.046	7.61	24.0452	-16.7532				19.6		62.5744	66.0882	66.4134	70.476	61.351	69.179	64.2792	63.6442	69.813	58.885	27.067	27.872	25.3912	24.1599	25.8102
21	1	0	34.25	28.03	922	0.256111		161	6.72	1.4881	509		0.6472	0.318262		130.67	93.95	28.84		93.6282	-28.3462	89.4474	-4.5	25.4268	-11.8239			20.3	15		101.834	105.474	108.158	104.855	104.358	88.3815	89.4188	89.3136	86.3905	86.6403	28.6685	30.5395	31.105	31.2729	31.1392
22	1	0	34.88	25.12	0	0		96	3.44	2.90698	551		0.1827	0.340896		60.37	82.14	14.85		66.7716	10.6013	96.9673	14.83	14.9867	0.942761		22.9		15		53.4577	61.4102	61.0307	63.2433	61.2808	72.3907	71.8847	64.6742	63.6657	62.6972	16.4621	16.7169	17.2816	15.987	16.3657
23	1	0	13.62	32.44	134214	37.2817		307	6.76	1.47929	402		0.2843	0.626065		50.33	48.1	20.31		61.0137	21.22	49.8055	1.71	23.5958	16.1989		15	17.4	15		46.7578	55.0637	53.2596	56.611	50.2947	42.0718	45.8464	43.3397	45.2846	37.8487	23.3099	23.67	24.0371	24.5561	23.6629
24	1	0	23.62	41.88	170340	47.3167		484	8.62	1.16009	324		0.3862	0.804443		5.3	1.42	14.86		8.03968	51.6981	0.505776	-0.91	14.228	-4.23957		103.1	15	15		4.19072	4.00841	3.51721	4.53967	6.0296	-0.0466991	14.1243	0.899033	3.42755	6.03548	14.6769	15.1635	14.8654	15.3966	14.8757
25	1	0	41	41.5	15123	4.20083		112	5.42	1.84502	620		0.0812	0.249		83.82	98.08	17.14		43.4007	-48.2224	69.4442	-28.64	15.8407	-7.5846				20		63.8588	71.3652	65.3956	59.8649	69.4716	90.5994	92.4363	88.6648	87.2746	90.6801	16.1847	16.5572	18.053	18.9024	18.6445
26	1	0	22.62	28.75	18499	5.13861		325	6.53	1.53139	447.5		3.4715	0.828147		120.21	78.24	25.11		137.679	14.5329	100.042	21.76	16.4879	-34.3289		15	15	15		130.179	125.52	130.09	129.13	137.705	92.0083	86.9808	84.1402	75.8954	78.3215	26.4544	29.5946	30.9375	30.6689	30.6069
27	1	0	30.5	24	152222	42.2839		242	5.15	1.94175	620		0.206	0.337		64.77	89.19	19.75		57.2702	-11.5794	87.9189	-1.27	20.634	4.4557		59.8	15	15		58.8451	57.014	62.2415	64.5723	58.1469	85.2744	81.8566	81.6865	81.9915	74.2374	21.1907	21.8112	22.0346	21.7581	21.3893
28	1	0	23.12	26.75	142540	39.5944		211	1.97	5.07614	592		0.0424	0.27845						.		.		.							.	.	.	.	.	.	.	.	.	.	.	.	.	.	.
29	1	0	27.75	44.19	25865	7.18472		169	5.97	1.67504	389.5		0.0806	0.340867		65.91	87.71	12.6		52.4696	-20.3914	79.6047	-8.11	13.5904	7.85714		58.6	66.5	15		52.5195	54.2713	63.5028	69.6193	67.8222	75.9153	70.9614	82.7014	88.5069	88.1336	14.9781	15.1721	16.627	14.5417	15.5303
30	1	0	38	40.88	169474	47.0761		349	6.88	1.45349	428		0.2465	0.499504						.		.		.							.	.	.	.	.	.	.	.	.	.	.	.	.	.	.
31	1	0	49	25.12	225497	62.6381		93	5.53	1.80832	576.5		0.0754	0.339091		120.6	97.97	26.59		69.8431	-42.0896	93.0838	-4.89	24.783	-6.80707		15	15	15		114.125	118.164	115.939	121.795	122.498	97.7969	98.3218	95.8704	95.2898	99.9455	28.0214	28.3594	26.3902	26.066	25.2934
32	1	0	21	16.62	115300	32.0278		293	5.06	1.97628	640		0.5007	0.253		63.97	75.67	20.24		53.8915	-15.7574	78.5402	2.87	21.8304	7.85573		15	15	15		76.1484	69.2544	75.5883	69.8516	72.2394	93.9422	82.1574	82.8052	77.6949	76.9852	23.1825	24.8029	25.5699	26.056	24.9866
33	1	0	8.94	10.5	32487	9.02417		218	6.6	1.51515	414		0.1388	0.254954		140.01	99.81	26.97		64.9907	-53.5819	87.2245	-12.59	21.3997	-20.6526			15			106.906	108.95	116.092	119.737	119.37	99.3891	100	99.5525	99.7969	99.6796	22.5463	23.2212	23.0835	23.7377	23.6413
1	1	1	15.56	24.38	263483	73.1897		92	6.03	1.65837	448		0.1717	0.479622		116.79	90.75	29.59		90.6643	-22.3735	84.8067	-5.94	30.4589	2.94018				15		101.808	104.716	91.8289	96.1182	105.791	82.2433	86.2653	69.0165	70.8291	75.8537	34.1672	35.3483	34.7285	33.5578	32.7693
2	1	1	14.75	17	9809	2.72472		195	8.5	1.17647	297		0.331	0.496053		81.06	59.44	27.12		38.904	-52.0109	22.1042	-37.34	32.4684	19.7271			80	15		62.2869	66.321	66.7453	74.2714	75.9112	49.4502	50.9543	48.1085	57.5872	55.4233	33.8621	34.3642	34.1319	34.2617	33.8552
3	1	1	9.62	19.06	145051	40.2919														.		.		.							.	.	.	.	.	.	.	.	.	.	.	.	.	.	.
4	1	1	45.88	66.12	181604	50.4456		104	6	1.66667	511		0.116	0.244622		59.7	83.25	13.42		71.7351	20.1675	95.6223	12.37	18.0657	34.6498		36.3	52.5	15		29.2158	58.1245	60.9622	69.2211	50.7054	47.913	77.3663	69.2043	84.6822	61.5718	20.3251	18.3443	16.7159	18.6103	18.2509
5	1	1	27.25	17.12	146163	40.6008		116	6.66	1.5015	413		0.2927	0.323785		81.73	80.17	32.31		45.232	-44.6592	56.5196	-23.65	28.7068	-11.1421				15.4		55.8325	65.0305	70.4615	69.0629	69.2974	64.4356	70.3684	75.7556	70.3077	70.5735	30.411	32.6811	32.4155	32.8467	33.0847
6	1	1	4.38	24.33	6421	1.78361														.		.		.							.	.	.	.	.	.	.	.	.	.	.	.	.	.	.
7	1	1	96	35.88	63286	17.5794		218	5.76	1.73611	504.5		0.035	0.34546		124.29	99.47	23.09		58.705	-52.7637	84.5553	-14.91	18.0804	-21.6977			15	15		88.9008	101.527	95.6123	100.666	104.789	95.3183	98.6914	94.4318	95.9828	97.2895	22.2846	23.4175	24.1164	23.9994	23.7549
8	1	1	38.38	31.38	73695	20.4708														.		.		.							.	.	.	.	.	.	.	.	.	.	.	.	.	.	.
9	1	1	8.75	19.94	27600	7.66667		164	9.45	1.0582	218		0.2447	0.246466		58.51	73.98	18.63		39.83	-31.9262	79.5409	5.56	19.1236	2.63017			35.9	15		.	43.8087	46.1916	45.145	43.035		60.8719	82.8502	69.9827	46.5971		20.6408	21.1144	21.0926	19.537
10	1	1	29.5	56.88	8925	2.47917		112	4.63	2.15983	543		0.1125	0.407884		115.11	99.42	23.8		46.738	-59.3954	75.2232	-24.2	19.996	-15.9664			15	15		88.9499	106.051	104.664	104.272	99.162	99.0482	98.4069	98.274	98.0125	95.2687	26.0251	23.0962	27.016	23.8284	22.6372
11	1	1	27.75	25.76	29662	8.23944														.		.		.							.	.	.	.	.	.	.	.	.	.	.	.	.	.	.
12	1	1	36.5	45.5	3186	0.885		377	6.25	1.6	358		0.1024	0.247863		107.98	95.28	32.55		45.9826	-57.418	64.443	-30.84	27.9595	-14.1014			116.9			81.3804	79.1225	81.9034	85.0535	90.7673	84.0634	87.5772	88.1672	87.679	91.0059	30.3565	30.087	30.2327	30.2764	30.7828
13	1	1	14.19	26.12	163422	45.395		248	5.19	1.92678	580		0.1486	0.242179		113.88	100	23.85		58.8176	-48.3491	76.5388	-23.46	24.9904	4.77987				15		63.1935	78.3652	84.4713	81.2713	95.0252	73.165	84.6939	88.906	86.3843	94.0732	26.5762	26.9502	26.1435	25.0179	24.2515
14	1	1	14.69	16.56	120	0.0333333		493	5.22	1.91571	321		0.129	0.305125		69.91	84.94	21.18		39.5321	-43.4559	75.3954	-9.54	18.6554	-11.898		40.5	15	15		.	62.9164	75.9235	88.7334	84.2699	.	83.7254	84.0215	91.4471	83.634	.	24.6226	25.7628	25.3001	25.2419
15	1	1	37.38	20.25	187681	52.1336		203	12.05	0.829876	232		0.2154	0.238739		32.74	28.39	17.65		37.4928	14.5083	43.8621	15.47	21.4381	21.4731		15	15	15		38.1248	38.795	27.8065	32.4457	20.598	38.2668	29.9272	16.4303	19.5272	12.8824	23.1641	23.1301	22.2799	23.3444	24.7898
16	1	1	25.94	36.38	7744	2.15111		145	7.63	1.31062	357		0.2174	0.26077		110.06	76.78	34.34		41.9267	-61.9026	35.6272	-41.15	32.9665	-3.98952				15		80.9307	85.2846	85.6444	70.4267	79.7386	65.9202	67.1604	67.8846	58.4424	59.0124	34.8897	35.9316	36.7771	36.0599	35.3918
17	1	1	44.88	24.95	36991	10.2753														.		.		.							.	.	.	.	.	.	.	.	.	.	.	.	.	.	.
18	1	1																		.		.		.							.	.	.	.	.	.	.	.	.	.	.	.	.	.	.
19	1	1	18.75	40.12	139786	38.8294		357	5.97	1.67504	357		0.0531	0.293956		101.84	98.12	24.4		52.0624	-48.8806	65.1149	-33.01	19.5628	-19.8361		71.6	15			89.5682	90.467	94.4917	99.8463	101.557	96.2808	97.411	97.0571	96.8012	98.2289	21.3859	21.9438	22.932	22.1744	22.3569
20	1	1	15.44	10.25	11550	3.20833		394	8.52	1.17371	285		0.2414	0.420208		156.36	99.8	32.46		90.1941	-42.319	96.6373	-3.16	30.9237	-4.7443			15	15		123.435	133.874	138.309	135.863	138.62	99.4616	99.5885	98.8101	98.4603	99.2127	33.8952	33.4717	34.4358	35.1107	34.9867
21	1	1	34.25	28.03	922	0.256111														.		.		.							.	.	.	.	.	.	.	.	.	.	.	.	.	.	.
22	1	1	34.88	25.12	0	0		76	5.46	1.8315	551		0.2847	0.368446		122.16	98.38	22.43		57.8061	-52.6768	76.7996	-21.58	19.638	-12.4387				15		82.8767	74.4495	83.9745	99.8654	101.599	86.617	76.6216	81.2265	88.3382	86.7704	21.8028	22.637	22.0368	21.5574	20.8289
23	1	1	13.62	32.44	134214	37.2817		319	9.33	1.07181	225.5		0.2019	0.555727		63.31	55.87	23.03		44.9424	-29.016	21.1452	-34.72	24.2115	5.12375				15		40.8868	42.0926	51.6722	48.8367	58.9929	32.0188	31.1724	43.1074	36.8804	36.9151	25.033	24.9581	25.0258	24.951	25.4393
24	1	1	23.62	41.88	170340	47.3167		302	7.03	1.42248	366		0.165	0.590554		28.3	38.8	16.61		22.3633	-20.9894	39.227	0.43	16.798	1.14389			15	15		20.1039	22.1945	18.8636	22.3139	20.2345	39	27.0656	20.3122	16.3594	12.7784	16.2742	16.3725	16.2911	15.9995	16.2911
25	1	1	41	41.5	15123	4.20083		108	4.72	2.11864	597		0.0763	0.250916		123.82	99.98	19.41		53.1344	-57.0909	78.361	-21.62	18.0602	-6.95518			27.1	18.3		79.7038	101.041	92.8017	106.898	102.749	89.7142	97.2651	97.0849	98.1044	99.1586	18.067	19.4515	20.3552	20.5087	21.0748
26	1	1	22.62	28.75	18499	5.13861		178	5.52	1.81159	517		1.3814	0.500224		164.04	95.59	24.03		127.129	-22.5006	98.1039	2.51	13.7362	-42.8215						137.723	131.53	135.666	132.239	151.339	.	53.0942	67.9575	64.0243	81.3359	.	13.7853	14.9139	16.8088	19.7795
27	1	1	30.5	24	152222	42.2839		248	3.66	2.73224	555.5		0.0742	0.400318		42.81	71.3	18.45		.		.		.							.	.	.	.	.	.	.	.	.	.	.	.	.	.	.
28	1	1	23.12	26.75	142540	39.5944		350	4.68	2.13675	631.5		0.2743	0.302942						.		.		.							.	.	.	.	.	.	.	.	.	.	.	.	.	.	.
29	1	1	27.75	44.19	25865	7.18472		64	5.78	1.7301	417		0.1702	0.353269		60.35	77.82	12.56		47.3382	-21.5576	76.938	-0.88	14.6655	16.7994		29.1	18.8	15		55.3849	55.3538	57.5556	49.6632	53.3883	71.8742	72.4905	75.3547	43.7311	58.051	13.4823	14.0953	13.5643	12.9335	12.7268
30	1	1	38	40.88	169474	47.0761		131	7.94	1.25945	364		0.0315	0.430598						.		.		.							.	.	.	.	.	.	.	.	.	.	.	.	.	.	.
31	1	1	49	25.12	225497	62.6381		99	5.18	1.9305	576		0.0809	0.298017		130.74	96.37	28.1		70.0243	-46.4433	82.0802	-14.29	28.8107	2.52669		20.6	15	15		121.016	128.149	130.637	129.461	135.094	94.6572	93.1413	93.2883	89.9227	89.0247	31.3748	31.7499	30.6209	29.2049	28.803
32	1	1	21	16.62	115300	32.0278		289	4.56	2.19298	586		0.2451	0.279077		77.24	86.75	20.6		54.5495	-29.376	72.6169	-14.13	21.2758	3.30097		15	15	15		79.4963	79.4766	80.7227	84.5964	97.6621	95.458	91.2702	93.9908	93.9294	99.171	22.8941	23.6654	24.7534	24.1061	24.0889
33	1	1	8.94	10.5	32487	9.02417		336	6.33	1.57978	422.5		0.1707	0.235748		141.04	99.9	26.69		74.1362	-47.4333	86.0286	-13.87	22.9918	-13.8629			15	16		112.265	107.823	113.754	112.318	116.33	99.8076	99.7208	99.8081	99.1737	99.2092	25.4982	25.687	27.5328	26.9515	26.7288
